# Supplementary material for: Enhanced vapor transport in membrane distillation via functionalized carbon nanotubes anchored into electrospun nanofibres
Source: PubMed Central journal article supplement (PMC5278503; doi:10.1038/srep41562), 2017-01-30
Supplement: srep41562-s1.pdf [file srep41562-s1.pdf]

# Enhanced vapor transport in membrane distillation via functionalized carbon nanotube anchored into electrospun nanofibers

Alicia Kyoungjin AN<sup>1\*</sup>, Eui-Jong Lee<sup>1</sup>, Jiaxin Guo<sup>1</sup>, Sanghyun Jeong<sup>2</sup>, Jung-Gil Lee<sup>2</sup>, and Noredine Ghaffour<sup>2</sup>

<sup>1</sup>*School of Energy and Environment, City University of Hong Kong, Tat Chee Avenue, Kowloon, Hong Kong, China,*

<sup>2</sup>*King Abdullah University of Science and Technology (KAUST), Water Desalination and Reuse Center (WDRC), Biological and Environmental Science & Engineering (BESE), Thuwal 23955-6900, Saudi Arabia*

\*Corresponding author's e-mail: [alicia.kjan@cityu.edu.hk](mailto:alicia.kjan@cityu.edu.hk)

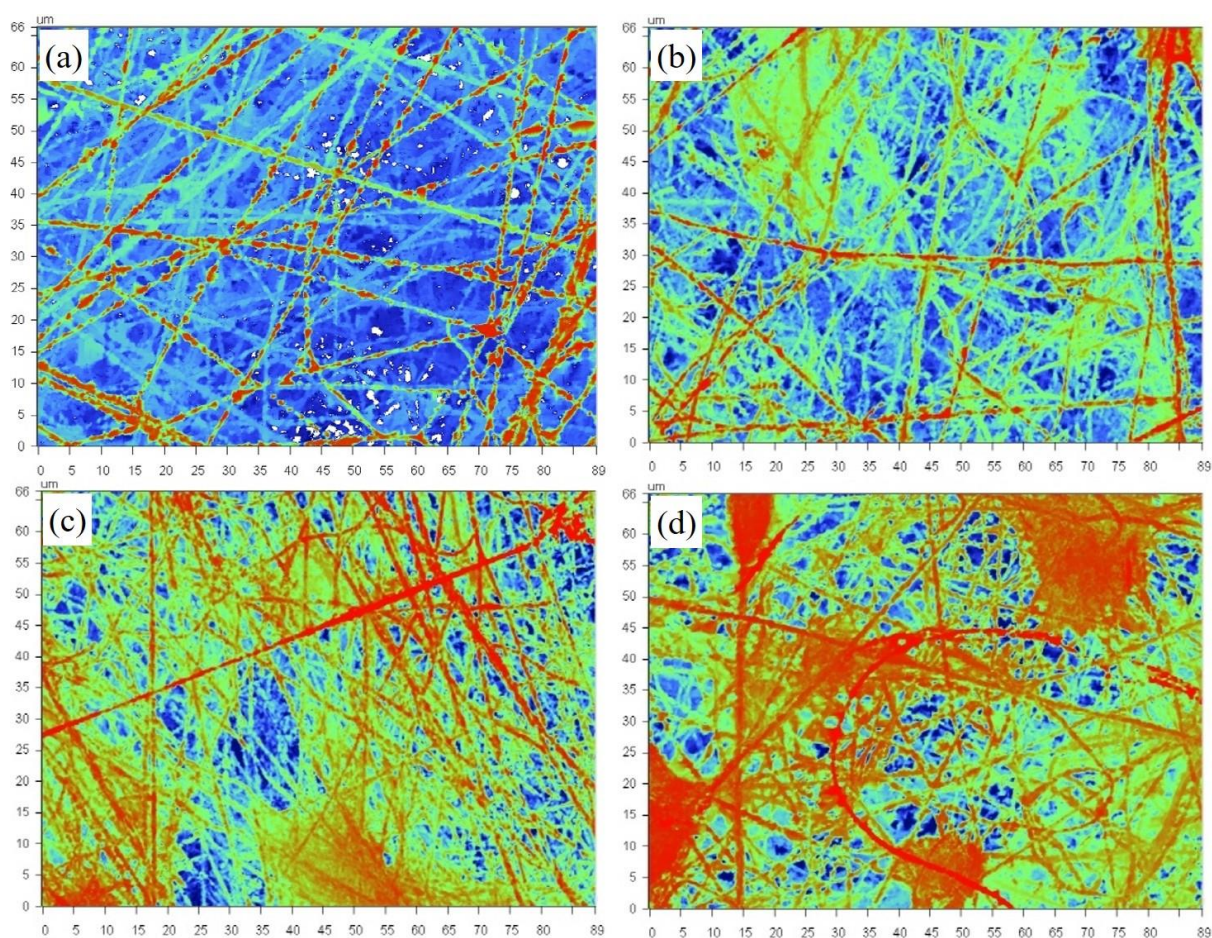

**Supplementary Figure S1.** Optical profiler images ( $88.8 \mu\text{m} \times 66.4 \mu\text{m}$ ) of (a) E-PH ( $R_a$ :  $1.35 \mu\text{m}$ ), (b) E-CNT1 ( $R_a$ :  $2.04 \mu\text{m}$ ), (c) E-CNT2 ( $R_a$ :  $2.43 \mu\text{m}$ ), and (d) E-CNT3 ( $R_a$ :  $2.53 \mu\text{m}$ ).

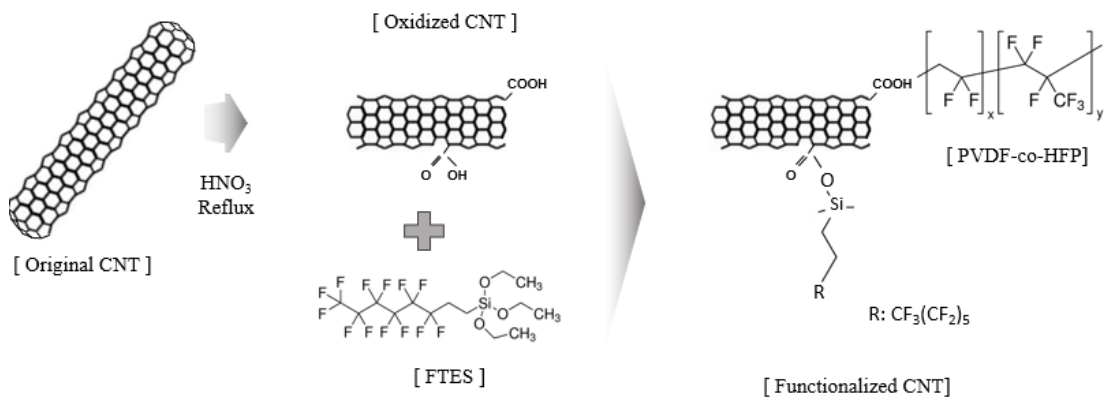

**Supplementary Figure S2.** A schematic diagram of CNT functionalization steps.

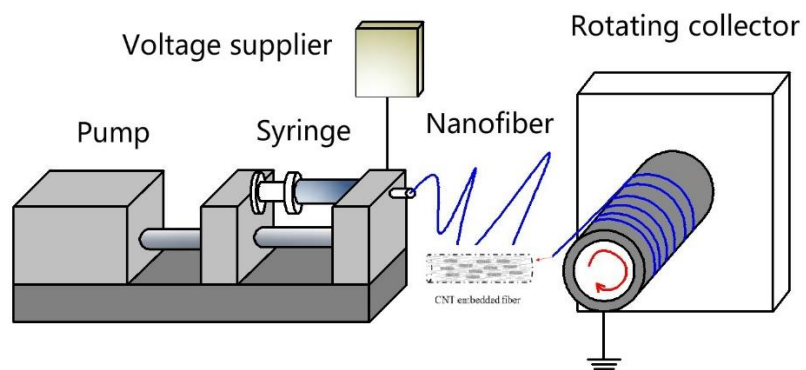

**Supplementary Figure S3.** A schematic drawing of the electrospinner.

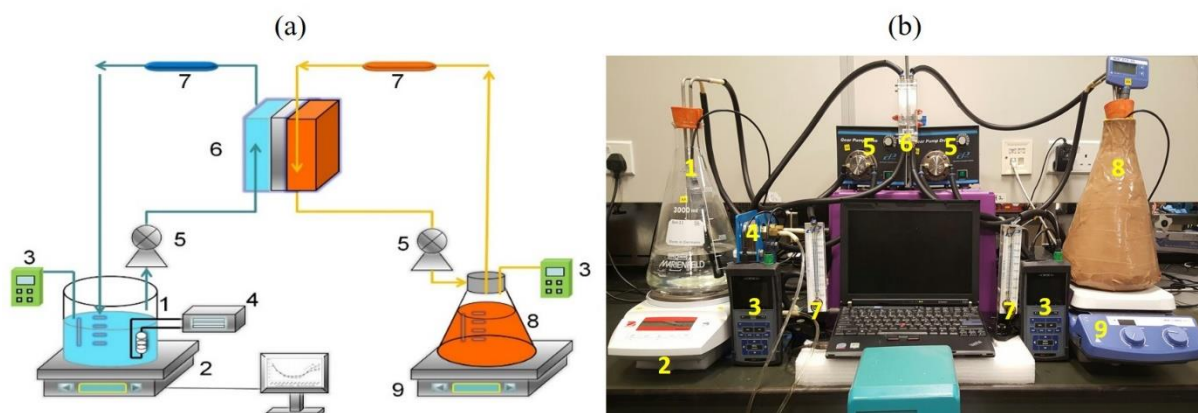

**Supplementary Figure S4.** (a) A schematic diagram of the DCMD test unit (1: Permeate tank, 2: Digital balance connected to a computer, 3: Thermometers, 4: Cooling unit, 5: Pumps, 6: Flat sheet membrane module, 7: Flow meters, 8: Feed reservoir, and 9: Hotplate). (b) A picture of experimental set-up of the DCMD test unit.

**Table S1.** Properties and DCMD performance using various types of electrospun membranes. Feed/permeate temperature: 60/20°C. 3.5 wt% NaCl feed solutions.

| Material                                            | Mean pore Size ( $\mu\text{m}$ ) | Porosity (%) | Thickness ( $\mu\text{m}$ ) | Contact angle ( $^\circ$ ) | Initial flux ( $\text{kg}/\text{m}^2/\text{h}$ ) | Rejection (%) |
|-----------------------------------------------------|----------------------------------|--------------|-----------------------------|----------------------------|--------------------------------------------------|---------------|
| <sup>a</sup> 67% clay-PVDF <sup>28</sup>            | 0.64                             | 81.0         | 300                         | 154.2                      | 5.5                                              | 99.95         |
| 222% SiO <sub>2</sub> -PVDF <sup>33</sup>           | 0.61                             | 79.7         | 100                         | 152.3                      | 43.0                                             | 99.99         |
| 50% TiO <sub>2</sub> -PVDF-HFP <sub>32</sub>        | 0.75                             | 91.6         | 100                         | 149.0                      | 40.0                                             | 99.99         |
| <sup>b</sup> Fluorinated polytriazole <sub>30</sub> | 2.70                             | -            | -                           | 162.0                      | 42.0                                             | 99.95         |
| <sup>c</sup> Polystyrene <sup>31</sup>              | 1.15                             | 77.5         | 120                         | 150.2                      | 63.2                                             | 99.99         |
| E-CNT3 of this study                                | 1.20                             | 89.4         | 88                          | 150.4                      | 48.5                                             | 99.98         |

<sup>a</sup> Feed/permeate temperature: 80/17°C.

<sup>b</sup> Feed/permeate temperature: 60/22°C. Feed: real sea water.

<sup>c</sup> Feed/permeate temperature difference ( $\Delta T$ ): 55°C.

\* Concentration of particles was based on weight of polymer.

**Supplementary Table S2.** Compositions of dope solutions for the electrospun membranes fabricated in this study.

| Electrospun membranes | PH (wt%) | DMF (wt%) | Acetone (wt%) | CNTs (wt% to PH) <sup>(1)</sup> |
|-----------------------|----------|-----------|---------------|---------------------------------|
| E-PH                  | 20       | 64        | 16            | 0                               |
| E-CNT0.5              | 20       | 64        | 16            | 0.5                             |
| E-CNT1                | 20       | 64        | 16            | 1                               |
| E-CNT2                | 20       | 64        | 16            | 2                               |
| E-CNT3                | 20       | 64        | 16            | 3                               |

<sup>(1)</sup> Weight percentage (wt%) of CNTs to polymer (PH).
